# Supplementary material
Source: PubMed Central journal article supplement (PMC3013056)
Supplement: NIHMS260057-supplement-Fig_S1.pdf [file NIHMS260057-supplement-Fig_S1.pdf]

Fig. S1

PCDH8, AAC70009

1 MSPVRRWGSP CLFPLQLFSL CWVLSVAQSK TVRYSTFEED APGTVIGTLA EDLHMKVSGD  
61 TSFRLMKQFN SLLLRVREGD GQLTVGDAGL DRERLCGQAP QCVLAFDVVS FSQEQFRLVH  
121 VEVEVRDVND HAPRFPPRAQI PVEVSEGA AV GTRIPLEVPV DEDVGANGLQ TVRLAEPHSP  
181 FRVELQTRAD GAQCADLVLL QELDRESQAA YSLELVAQDG GRPPRSATAA LSVRVLDAND  
241 HSPAFPQGAV AEVELAEDAP VGSLLLDLDA ADPDEGPNGD VVFAFGARTP PEARRLFRLD  
301 PRSGRLTLAG PVDYERQDTY ELDVRAQDRG PGPRAATCKV IVRIRDVNDN APDIAITPLA  
361 APGAPATSPF AAAAAAAAAALG GADASSPAGA GTPEAGATSL VPEGAARES L VALVSTSDRD  
421 SGANGQVRCA LYGHEHFRLQ PAYAGSYLVV TAASLDRERI AEYNLTLVAE DRGAPPLRTV  
481 RPYTVRVGDE NDNAPLFTRP VYEVSVRENN PPGAYLATVA ARDRDLGRNG QVTYRLLEAE  
541 VGRAGGAVST YVSVDPATGA IYALRSFDYE TLRQLDVRIQ ASDGGSPQLS SSALVQVRVL  
601 DQNDHAPVLV HPAPANGSLE VAVPGRTAKD TVVARVQARD ADEGANGELA FELQQQEPRE  
661 AFAIGRRTE ILLTGDLSEQ PPGRVFRALL VISDGGRPPL TTTATVSFVV TAGGGRGPAA  
721 PASAGSPERS RPPGSRLGVS GSVLQWDTPL IVIIIVLAGSC TTTTAAIIAI ATTCNRRKKE  
781 VRKGGALREE RPGAAGGGAS APGSPEEAAR GAGPRPNMFD VLTFFPGTGKA PFGSPAADAP  
841 PPAVAAAQVP GSEGGSATGE SACHFEGQQR LRGAAHEPYG ASPGFGKEPA PPVAVWKGHS  
901 FNTISGREAE KFSGKDSGKG DSDFNDSDS ISGDALKKDL INHMQSGLWA *CTAECKILGH*  
961 *SDRCWSPSCS* *GPNAHPSHP* *PAQMSTFCKS* TSLPRDPLRR DNYQAQLPK TVGLQSVYEK  
1021 VLHRDYDRTV TLLSPPRPRGR LPDLQEIGVP **LYQSPPGRYL** **SPKKGANENV**

| Cell lines  | Meth/Unmeth | RT-PCR |
|-------------|-------------|--------|
| MDA-MB-435s | M           | -      |
| ZR-75-30    | M           | -      |
| SUM229PE    | M           | -      |
| SUM190PT    | M           | -      |
| BT-483      | U           | -      |
| MDA-MB-436  | U           | +      |
| Hs578t      | U           | +      |
| CAMA-1      | U           | +      |
| MCF7        | U           | +      |
| HCC1428     | U           | +      |
| HCC1937     | U           | +      |
| SUM159PT    | U           | +      |

**Table S1. Methylation of PCDH8 correlates with loss of message.** 4/5 (80%) of cell lines with undetectable levels of message exhibit methylation of the PCDH8 promoter. M=methylated, U=unmethylated, -=no detection of message, +=detection of message.

|         | <u>PCDH8+</u> | <u>PCDH8-</u> |
|---------|---------------|---------------|
| LOH+    | 10            | 7             |
| LOH-    | 17            | 1             |
|         | (p=0.0178)    |               |
| Unmeth  | 8             | 7             |
| Meth    | 0             | 6             |
|         | (p=0.0456)    |               |
| ER+     | 26            | 2             |
| ER-     | 3             | 5             |
|         | (p=0.001)     |               |
| PR+     | 21            | 0             |
| PR-     | 8             | 7             |
|         | (p=0.001)     |               |
| S-phase |               |               |
| >10     | 10            | 7             |
| <10     | 13            | 1             |
|         | (p=0.0454)    |               |

**Table S2. PCDH8 loss correlates with loss of heterozygosity (LOH), promoter methylation, loss of estrogen receptor (ER) expression, loss of progesterone receptor (PR) expression, and increased S-phase tumors.**  
 LOH+ = presence of LOH, LOH- = absence of LOH, Unmeth=unmethylated, Meth=methylated.

| Amplification primers | Sequence                 | Sequencing primers | Sequence             |
|-----------------------|--------------------------|--------------------|----------------------|
| PCDH8-F5              | CCTTAGCCTTTCGGATCGCACT   | P8SEQF1B           | ATGAGTCCTGTGAGGCGT   |
| PCDH8-R5              | CTCGCGTCTGCAGCTCCA       | P8SEQR2            | AAGGCCAGCACGCACTGCG  |
|                       |                          | P8SEQF2            | CGCAGTGCGTGCTGGCCTT  |
|                       |                          | P8SEQF0            | AGCCTTTCGGATCGCACT   |
|                       |                          | P8SEQR0            | CTGTGCGGCTCGGCCAG    |
| PCDH8-F6C             | TTTCGCGTGGAGCTGCAGAC     | P8SEQF12           | GACGCGAGCGGACGGCG    |
| PCDH8-R6D             | TTGTCGTTCTCGTCGCCAC      | P8SEQF4            | CGCGATCAGGCCGCT      |
|                       |                          | P8SEQF5            | TGCCACTTCGCTGGTGCC   |
| PCDH8-BKUP3F          | GTGCGCTGCGCCCTCTATG      | P8SEQF13           | GCCCTCTATGGGCACGAG   |
| PCDH8-BKUP3R          | CTGTTACCACGAAGCTGACA     | P8SEQF6            | CCGGTCTATGAGGTGTCG   |
|                       |                          | P8SEQF7            | CTGGACCAGAACGACCATGC |
|                       |                          | P8SEQR8            | ACAGTTGCGGTGGTGGT    |
| PCDH8-F4              | CAGGAGCCGCGCGAAG         | PCDH8-F4           | CAGGAGCCGCGCGAAG     |
| PCDH8-R4              | CTGCAGCAGGGAATAGGG       | P8SEQF14           | GAAGCCTTCGCCATCGGCCG |
|                       |                          | PCDH8-R4           | CTGCAGCAGGGAATAGGG   |
|                       |                          | P8SEQR11           | CGGGAGCCGAGGCTCCGCC  |
| PCDH8-X2F             | GGTAGGGTGGGTGCATTCAGGTAG | 13-50F             | GTAGACAACCTGTCGCACTT |
| PCDH8-X2R             | GCGGGAAAGAAGAGTCCTCACCAC | P8SEQX2R           | CTCACCCTCTGCATGTGGT  |
| PCDH8-X3F             | CTGACCCAGGCTGACATGCTGAAG | P8SEQX3F           | GGAAGCCTGAATATGTATAA |
| PCDH8-X3R             | TTAGGGGCTTCTCGGAGTGACCTG | P8R2C              | CGGAGTGACCTGTATATGTG |

**Table S3. Catalogue of PCDH8 PCR amplification and sequencing primers.**
