# Supplementary material
Source: PubMed Central journal article supplement (PMC3013056)
Supplement: NIHMS260057-supplement-Table_S1.pdf [file NIHMS260057-supplement-Table_S1.pdf]

| Cell lines  | Meth/Unmeth | RT-PCR |
|-------------|-------------|--------|
| MDA-MB-435s | M           | -      |
| ZR-75-30    | M           | -      |
| SUM229PE    | M           | -      |
| SUM190PT    | M           | -      |
| BT-483      | U           | -      |
| MDA-MB-436  | U           | +      |
| Hs578t      | U           | +      |
| CAMA-1      | U           | +      |
| MCF7        | U           | +      |
| HCC1428     | U           | +      |
| HCC1937     | U           | +      |
| SUM159PT    | U           | +      |

**Table S1. Methylation of PCDH8 correlates with loss of message.** 4/5 (80%) of cell lines with undetectable levels of message exhibit methylation of the PCDH8 promoter. M=methylated, U=unmethylated, -=no detection of message, +=detection of message.
