# Supplementary material
Source: PubMed Central journal article supplement (PMC3013056)
Supplement: NIHMS260057-supplement-Table_S3.pdf [file NIHMS260057-supplement-Table_S3.pdf]

| Amplification primers | Sequence                 | Sequencing primers | Sequence             |
|-----------------------|--------------------------|--------------------|----------------------|
| PCDH8-F5              | CCTTAGCCTTTCGGATCGCACT   | P8SEQF1B           | ATGAGTCCTGTGAGGCGT   |
| PCDH8-R5              | CTCGCGTCTGCAGCTCCA       | P8SEQR2            | AAGGCCAGCACGCACTGCG  |
|                       |                          | P8SEQF2            | CGCAGTGCCTGCTGGCCTT  |
|                       |                          | P8SEQF0            | AGCCTTTCGGATCGCACT   |
|                       |                          | P8SEQR0            | CTGTGCGGCTCGGCCAG    |
| PCDH8-F6C             | TTTCGCGTGGAGCTGCAGAC     | P8SEQF12           | GACGCGAGCGGACGGCG    |
| PCDH8-R6D             | TTGTCGTTCTCGTCGCCAC      | P8SEQF4            | CGCGATCAGGCCGCT      |
|                       |                          | P8SEQF5            | TGCCACTTCGCTGGTGCC   |
| PCDH8-BKUP3F          | GTGCGCTGCGCCCTCTATG      | P8SEQF13           | GCCCTCTATGGGCACGAG   |
| PCDH8-BKUP3R          | CTGTTACCACGAAGCTGACA     | P8SEQF6            | CCGGTCTATGAGGTGTCG   |
|                       |                          | P8SEQF7            | CTGGACCAGAACGACCATGC |
|                       |                          | P8SEQR8            | ACAGTTGCGGTGGTGGT    |
| PCDH8-F4              | CAGGAGCCGCGCGAAG         | PCDH8-F4           | CAGGAGCCGCGCGAAG     |
| PCDH8-R4              | CTGCAGCAGGGAATAGGG       | P8SEQF14           | GAAGCCTTCGCCATCGGCCG |
|                       |                          | PCDH8-R4           | CTGCAGCAGGGAATAGGG   |
|                       |                          | P8SEQR11           | CGGGAGCCGAGGCTCCGCC  |
| PCDH8-X2F             | GGTAGGGTGGGTGCATTCAGGTAG | 13-50F             | GTAGACAACCTGTGCACTT  |
| PCDH8-X2R             | GCGGGAAAGAAGAGTCCTCACCAC | P8SEQX2R           | CTCACCCTCTGCATGTGGT  |
| PCDH8-X3F             | CTGACCCAGGCTGACATGCTGAAG | P8SEQX3F           | GGAAGCCTGAATATGTATAA |
| PCDH8-X3R             | TTAGGGGCTTCTCGGAGTGACCTG | P8R2C              | CGGAGTGACCTGTATATGTG |

**Table S3. Catalogue of PCDH8 PCR amplification and sequencing primers.**
